# Supplementary material
Source: publisher figshare collection journal article supplement (https://gsajournals.figshare.com/ndownloader/files/31954190)
Supplement: Supplementary file 1 [file 31954190]

## Sheet: Sheet1
Table S6. Summary of individual-trait support intervals in joint-linkage analysis results for which one or more support interval bounds did not uplift to RefGen_v4 coordinates. Physical positions (bp) are reported in RefGen_v2 coordinates (where indicated with 'v2') and RefGen_v4 coordinates (where indicated with 'v4'). Trait names are as written (α = a, β = b), unless shortened as follows: zeino…
Trait	Chr_v2	Peak_Position_v2	Chr_Nearest_v4	Peak_Nearest_v4	Numb.Shifted.Peak	Supp_Int_Left_v2	Chr_Int_Left_v4	Supp_Int_Left_v4	Numb.Shifted.Left	Supp_Int_Right_v2	Chr_Int_Right_v4	Supp_Int_Right_v4	Numb.Shifted.Right	Peak_Marker_Name	P.value	PVE	Candidate_Gene_in_Support_Interval	Number_of_Families_with_QTL	Families_with_QTL	Common.SI.tracker	Common.bp.left_v2	Common.bp.right_v2
traitKC	2	48526286	Chr2	50262905	2	43354731	Chr2	45218037	0	60625860	B73V4_ctg56	B73V4_ctg56_134017	CONTIG	S_48526286	2.51e-11	0.0304973	, zeaxanthin_epoxidase(zep1)	2	NC350 , Ki11 ,	6	43151039	60625860
phytofluene	3	172015899	B73V4_ctg26	22359	CONTIG	163198077	B73V4_ctg20	B73V4_ctg20_53550	CONTIG	173596102	Chr3	176182545	1	S_172015899	5.74e-06	0.0174871	, 2-C-methyl-D-erythritol_4-phosphate_cytidyltransferase(dmes1)	4	Oh7B , Ki11 , Hp301 , B97 ,	7	163198077	173596102
phytofluene	4	2043040	Chr4	2598794	0	83463	Chr3	234552234	WRONG CHR	2820890	Chr4	3423537	1	S_2043040	3.77e-10	0.0274332	, NA,	4	NC358 , NC350 , Ki11 , CML228 ,	9	83463	2820890
b_carotene	6	82330266	Chr6	85388415	0	79915132	B73V4_ctg104	B73V4_ctg104_67455	CONTIG	85191341	Chr6	87936649	0	S_82330266	9.96e-14	0.042307	, phytoene_synthase(y1)	5	Tx303 , NC358 , Ki11 , CML52 , CML228 ,	14	71904419	85595339
zeino	6	82648835	Chr6	85388415	1	79915132	B73V4_ctg104	B73V4_ctg104_67455	CONTIG	84008381	Chr6	87133369	0	S_82648835	1.14e-57	0.0853448	, phytoene_synthase(y1)	10	Tx303 , Oh7B , NC358 , NC350 , Ki3 , Ki11 , Hp301 , CML52 , CML228 , B97 ,	14	71904419	85595339
lutein	7	150879260	Chr7	156188079	0	148454268	Chr5	160124886	WRONG CHR	151995130	Chr7	157468099	1	S_150879260	3.7e-11	0.0146566	, NA,	3	Ki11 , Hp301 , CML228 ,	17	148454268	154734084
traitKC	9	20610403	Chr9	20405099	0	20333901	B73V4_ctg129	B73V4_ctg129_19931	CONTIG	21771712	Chr9	21687034	2	S_20610403	1.93e-17	0.0443797	, 1-deoxy-D-xylulose_5-phosphate_synthase_(dxs3)	6	Tx303 , Oh7B , NC350 , Ki11 , CML52 , CML228 ,	23	19670296	23258964
lutein	9	20776304	Chr9	20562028	0	20333901	B73V4_ctg129	B73V4_ctg129_19931	CONTIG	21937613	Chr9	21757440	0	S_20776304	1.31e-20	0.0232533	, 1-deoxy-D-xylulose_5-phosphate_synthase_(dxs3)	6	Tx303 , Oh7B , NC350 , Ki3 , CML52 , CML228 ,	23	19670296	23258964
total_carot	9	20776304	Chr9	20562028	0	20223300	B73V4_ctg129	186544	1	21771712	Chr9	21687034	2	S_20776304	1.16e-37	0.0696339	, 1-deoxy-D-xylulose_5-phosphate_synthase_(dxs3)	7	Tx303 , Oh7B , NC350 , Ki3 , Ki11 , CML52 , CML228 ,	23	19670296	23258964
zeaxanthin	9	150477333	Chr9	153644930	0	150253458	Chr9	153423096	0	150663895	Chr7	157416983	WRONG CHR	S_150477333	1.87e-33	0.06881	, NA,	1	NC350 ,	24	149581833	150857532
